# Supplementary material for: Semiotics and NLP Integration in Heritage Communication: A Case Study of Urban Destinations
Source: Research Square preprint supplement (doi:10.21203/rs.3.rs-8882435/v1), 2026-02-17
Supplement: Supplementary file 1 [file 0fa52206ec60bae7cdc95c57.docx]

Table 6. Hamamönü Visual Content Analysis Findings

| **Analysis Category** | **Subcategories and Distribution** | **Findings and Interpretations** |
| --- | --- | --- |
| **Thematic Codings** | - Traditional Cultural Heritage (62%): Ottoman architecture, wooden mansions, hand-woven carpets. - Local Gastronomy (23%): Street foods (Ankara tava), traditional coffeehouses. | Cultural heritage and gastronomy themes highlight the destination's "nostalgic" and "authentic" identity. These align with Bourdieu’s (1977) notion of cultural capital, creating a strong emphasis on authenticity. |
| **Color Distribution** | - Warm tones: Brown (45%), beige (30%). | The warm color palette supports the perception of a “warm” and “welcoming” atmosphere (Lo et al., 2011). |
| **Composition** | - Close-up shots (58%): Focused on artisans and craftsmanship. | Close-up compositions emphasize authenticity and manual craftsmanship, reinforcing the cultural value of the destination (Pan et al., 2007). |
| **Visitor Comments** | - Metaphors such as “time travel,” “cultural belonging.” | Visual themes appear to foster historical and emotional connections among visitors. |
