# Supplementary material for: Semiotics and NLP Integration in Heritage Communication: A Case Study of Urban Destinations
Source: Research Square preprint supplement (doi:10.21203/rs.3.rs-8882435/v1), 2026-02-17
Supplement: Supplementary file 2 [file 3fd9f16d1eeafc247762de76.docx]

Table 2. Emotion Analysis Components and Application Methods

| **Step** | **Definition** | **Tool / Method** | **Source** |
| --- | --- | --- | --- |
| **Tokenization** | Splitting raw texts into words or token units; segmenting by punctuation and spaces | NLTK word_tokenize | Bird et al., (2009) |
| **Stop-word Removal** | Eliminating insignificant words (e.g., conjunctions, prepositions) from the dataset | NLTK stopwords | Bird et al., (2009) |
| **Stemming** | Reducing words to their root form (e.g., “running” → “run”) | Porter Stemmer | Porter (1980) |
