# Supplementary material for: Semiotics and NLP Integration in Heritage Communication: A Case Study of Urban Destinations
Source: Research Square preprint supplement (doi:10.21203/rs.3.rs-8882435/v1), 2026-02-17
Supplement: Supplementary file 3 [file 60da8f5287670739fbe0afbe.docx]

Table 5. Research Analysis Axes and Methodological Framework

| **Analysis Axis** | **Method and Tools** | **Theoretical Framework** | **Data Sources** | **Key Findings** |
| --- | --- | --- | --- | --- |
| **Thematic Analysis** | - Semiotic analysis of visual and textual content - Qualitative coding (NVivo 12) | - Barthes’ model of “semiotic layering” (1964) - Peirce’s theory of “iconic sign” (1932) | Instagram, Facebook, X (Twitter) data | “Cultural heritage” theme dominant in Hamamönü (62%), “historical identity” in Ankara Castle (45%), “archaeological collections” in the museum (78%) |
| **Sentiment Distribution** | - VADER Sentiment Analysis - Brandmentions Web Monitoring - Manual validation (Cohen’s κ = 0.78) | - Lazarus’ theory of “emotional adaptation” (1991) | 2,500 user comments (Turkish/English) | Positive emotion intensity at the Museum of Anatolian Civilizations (82%); negative criticisms in Ankara Castle (28%) |
| **Comparative Analysis Across Destinations** | - Comparative evaluation of spatial representation forms | - Gnoth’s “destination image” theory (2002) | 1,500 visual + textual data entries | Hamamönü associated with “nostalgic authenticity,” Ankara Castle with “historical sublime,” and the museum with “scientific authority” |
