# Supplementary material for: Semiotics and NLP Integration in Heritage Communication: A Case Study of Urban Destinations
Source: Research Square preprint supplement (doi:10.21203/rs.3.rs-8882435/v1), 2026-02-17
Supplement: Supplementary file 4 [file 67f93bda53ddd07b461df933.docx]

**Place Branding and Public Diplomacy- Article Submission Checklist**

**Title & Abstract**

- Title is concise, informative, and reflects the study’s focus.
- Abstract clearly summarizes research aims, methods, key findings, and contributions (max 250 words).
- Keywords (4–6) relevant to tourism and digital heritage included.

**Introduction & Literature Review**

- Research problem, objectives, and gap clearly stated.
- Relevant, up-to-date literature reviewed and critically analyzed.
- Theoretical framework established.

**Methodology**

- Research design (qualitative, quantitative, mixed) clearly described.
- Data sources and sampling methods detailed.
- Analytical methods (semiotic analysis, NLP tools) explained.
- Ethical considerations addressed (e.g., data privacy, permissions).

**Results & Discussion**

- Key findings clearly presented with supporting tables/figures.
- Results interpreted in relation to research questions and literature.
- Limitations and implications for theory and practice discussed.

**Conclusion**

- Study contributions clearly summarized.
- Recommendations and future research directions provided.

**References**

- All references cited correctly and formatted according to journal guidelines (APA 7th edition).
- Recent and relevant sources included.

**Language & Formatting**

- Manuscript written in clear, formal academic English.
- Grammar, spelling, and punctuation checked.
- Manuscript adheres to journal formatting and word count limits.

**Ethical & Technical Checks**

- Originality confirmed; plagiarism check completed.
- All necessary permissions obtained for data and images.
- Figures and tables properly labeled and referenced.
