# Supplementary material for: Semiotics and NLP Integration in Heritage Communication: A Case Study of Urban Destinations
Source: Research Square preprint supplement (doi:10.21203/rs.3.rs-8882435/v1), 2026-02-17
Supplement: Supplementary file 5 [file 6f51ea9a5fd63b0d0d4eb698.docx]

Table 3. Sentiment Scoring Components and Implementation Methods

| **Stage** | **Process** | **Detail** | **Source** |
| --- | --- | --- | --- |
| **Sentiment Lexicon** | Loading sentiment word list and weight values | Pre-trained lexicon file of VADER | Hutto & Gilbert (2014) |
| **Rules** | Grammar- and punctuation-based amplification/reduction rules | Negation (“not good” → “positive”), emphasis indicators, etc. | Hutto & Gilbert (2014) |
| **Compound Score** | Single score per comment | Calculates negative, neutral, positive ratios and an overall compound score | Hutto & Gilbert (2014) |
