# Supplementary material for: Semiotics and NLP Integration in Heritage Communication: A Case Study of Urban Destinations
Source: Research Square preprint supplement (doi:10.21203/rs.3.rs-8882435/v1), 2026-02-17
Supplement: Supplementary file 6 [file 77f66eac60d9f2b714d54f31.docx]

Table 4. Manual Validation Components and Application Methods

| **Process** | **Detail** | **Source** |
| --- | --- | --- |
| **Sample Selection** | Randomly selected 500 comments | — |
| **Human Coding** | Assigning each comment a label: “positive,” “negative,” or “neutral” | Carletta (1996) |
| **Reliability Measurement** | Inter-coder agreement assessed by calculating Cohen’s κ = 0.78 | Cohen (1960) |
| **Disagreement Resolution** | Final decision made by a third expert for comments with conflicting labels | Carletta (1996) |
