# Supplementary material for: Semiotics and NLP Integration in Heritage Communication: A Case Study of Urban Destinations
Source: Research Square preprint supplement (doi:10.21203/rs.3.rs-8882435/v1), 2026-02-17
Supplement: Supplementary file 7 [file a3b16293ba90cfefa0cf50eb.docx]

Table 7. Ankara Castle Visual Content Analysis Findings

| **Analysis Category** | **Subcategories and Distribution** | **Findings and Interpretations** |
| --- | --- | --- |
| **Thematic Coding** | - Historical Identity (45%): Ancient walls, archaeological remains. - Panoramic Views (32%): City skyline, sunset photographs. | Historical and landscape themes reinforce the destination's perception of "historical power" and "aesthetic sublime." Panoramic posts align with Urry’s (1990) tourist gaze theory, turning the place into an object of visual consumption. |
| **Color Distribution** | - Earth tones: Grey (38%), terracotta (25%) | Earth tones strengthen the "gloomy" and "historical" image of the destination, creating a sense of deep historical presence. |
| **Composition** | - Wide-angle shots (49%): Emphasis on scale and grandeur | Wide-angle compositions highlight the destination's grandeur, leaving a strong visual impression on the viewer (Garrod, 2009). |
| **Visitor Comments** | - Emphasis on "historical power", "aesthetic sublime" | Visual themes have been observed to evoke a sense of historical depth and aesthetic admiration in visitors. |
