# Supplementary material for: Semiotics and NLP Integration in Heritage Communication: A Case Study of Urban Destinations
Source: Research Square preprint supplement (doi:10.21203/rs.3.rs-8882435/v1), 2026-02-17
Supplement: Supplementary file 8 [file a3bc803d63fff7d33ad66124.docx]

Table 8. Visual Content Analysis Findings of the Museum of Anatolian Civilizations

| **Analysis Category** | **Subcategories and Distribution** | **Findings and Interpretations** |
| --- | --- | --- |
| **Thematic Coding** | - Archaeological Collections (78%): Hittite and Phrygian artifacts (e.g., lion statues, tablets). - Education-Oriented Exhibits (15%): Interactive information panels, children's workshops. | The archaeological emphasis reinforces the narrative of a "civilizational hierarchy," while modern exhibition techniques establish a scientific and pedagogical identity (Duncan, 1995). |
| **Color Distribution** | - Blue (40%) and Grey (35%) tones | Blue and grey tones strengthen the museum's "professional" and "scientific" image, fostering a sense of trust and credibility among viewers. |
| **Composition** | - Symmetrical framing (67%): Arrangement highlighting the aesthetic value of artifacts. | Symmetrical compositions emphasize the artistic and historical significance of the objects, reinforcing the institutional authority of the museum. |
| **Visitor Comments** | - References to "scientific authority" and "educational experience" | Visual themes inspired respect for knowledge and motivated learning among visitors. |
