# Supplementary material for: Semiotics and NLP Integration in Heritage Communication: A Case Study of Urban Destinations
Source: Research Square preprint supplement (doi:10.21203/rs.3.rs-8882435/v1), 2026-02-17
Supplement: Supplementary file 9 [file b365c32daeb63646f1d4c53a.docx]

Table 9. Engagement and Comment Ratios by Platform for Destinations

| **Platform** | **Anatolian Civilizations MuseumComments** | **Reach** | **Ratio** | **Ankara CastleComments** | **Reach** | **Ratio** | **HamamönüComments** | **Reach** | **Ratio** |
| --- | --- | --- | --- | --- | --- | --- | --- | --- | --- |
| **X (Twitter)** | 2,506 | 9,532,861 | 0.263 | 1,266 | 8,848,005 | 0.143 | 237 | 3,213,318 | 0.074 |
| **Instagram** | 497 | 11,397,440 | 0.044 | 597 | 2,486,140 | 0.240 | 431 | 13,539,026 | 0.032 |
| **Facebook** | 305 | 1,068,317 | 0.285 | 117 | 19,962,821 | 0.006 | 59 | 237,256 | 0.249 |
| **Total** | 3,308 | 21,998,618 | 0.15 | 1,980 | 31,296,966 | 0.06 | 727 | 16,989,600 | 0.04 |
