# Supplementary material for: Semiotics and NLP Integration in Heritage Communication: A Case Study of Urban Destinations
Source: Research Square preprint supplement (doi:10.21203/rs.3.rs-8882435/v1), 2026-02-17
Supplement: Supplementary file 10 [file c2a455175081e72095d70429.docx]

Table 11. Distribution of Emotional Analysis Findings of Destinations

| **Destination** | **Positive** | **Negative** | **Neutral** |
| --- | --- | --- | --- |
| **Anatolian Civilizations Museum** | 1,365 | 1,116 | 827 |
| **Ankara Castle** | 926 | 462 | 592 |
| **Hamamönü** | 437 | 215 | 75 |
