# Supplementary material for: Semiotics and NLP Integration in Heritage Communication: A Case Study of Urban Destinations
Source: Research Square preprint supplement (doi:10.21203/rs.3.rs-8882435/v1), 2026-02-17
Supplement: Supplementary file 11 [file c453877e54c64ded1bb8dd62.docx]

**Highlights of Journal**

- Analysis scope: 6,015 text comments (X/Instagram/Facebook) via VADER NLP sentiment analysis, 900 images (300 per destination) via color/composition/thematic coding, with 500 comments manually validated.
- Social media representations confirmed multidimensional destination identity (nostalgia/critique/authority), while the mixed-method approach (visual semiotics + NLP) empirically validated hypotheses.
- Social media plays a role in both constructing and constraining Ankara’s heritage identity; the fragmentation between historical/modern representations mediated by local narratives is revealed.
- The integration of visual semiotics (color/composition/symbols) and NLP sentiment analysis reveals gaps between corporate strategies and user narratives.
- Recommends AI-based content optimization + digital ethnography for sustainable branding; addresses bias through cultural algorithm design.
