# Supplementary material for: Semiotics and NLP Integration in Heritage Communication: A Case Study of Urban Destinations
Source: Research Square preprint supplement (doi:10.21203/rs.3.rs-8882435/v1), 2026-02-17
Supplement: Supplementary file 12 [file ea870da721413481f0000e56.docx]

Table 10. Distribution of Emotional Analysis Findings of Destinations by Platforms

| **Platform** | **Anatolian Civilizations MuseumPositive** | **Negative** | **Neutral** | **Ankara CastlePositive** | **Negative** | **Neutral** | **HamamönüPositive** | **Negative** | **Neutral** |
| --- | --- | --- | --- | --- | --- | --- | --- | --- | --- |
| **X (Twitter)** | 929 | 930 | 647 | 568 | 351 | 347 | 117 | 103 | 17 |
| **Instagram** | 282 | 95 | 120 | 303 | 96 | 198 | 282 | 98 | 51 |
| **Facebook** | 154 | 91 | 60 | 55 | 15 | 47 | 38 | 14 | 7 |
| **Total** | 1,365 | 1,116 | 827 | 926 | 462 | 592 | 437 | 215 | 75 |
