# Supplementary material for: Semiotics and NLP Integration in Heritage Communication: A Case Study of Urban Destinations
Source: Research Square preprint supplement (doi:10.21203/rs.3.rs-8882435/v1), 2026-02-17
Supplement: Supplementary file 13 [file f1270b517322116afa042fb2.docx]

Table 1.Visual Analysis Components and Application Methods

| **Component** | **Method / Tool** | **Application Detail** |
| --- | --- | --- |
| **Color and Aesthetics** | • Adobe Color for color palette analysis • Color psychology theory (Lo et al., 2011) | - The three dominant colors in the visuals were identified and their tones (warm/cool) classified.  - The function of each color in destination perception was interpreted. |
| **Composition and Focal Objects** | • Visual design principles (symmetry, perspective)  • Object recognition in images | - Framing was examined based on symmetry and the rule of thirds.  - Focal objects such as historical buildings and local food were manually marked and coded. |
| **Thematic Coding** | • NVivo 12 for coding  • Two independent coders (κ = 0.82) | - A coding scheme was created based on predefined themes (historical, cultural, gastronomic, infrastructural).  - Inter-code consistency was cross-validated. |
